# Supplementary material
Source: publisher figshare collection journal article supplement (https://tandf.figshare.com/ndownloader/files/37590773)
Supplement: Supplementary file 1 [file 37590773]

Supplementary table S1 Data sources for direct costs in each country

|  | **Cost type** | **Source** | **Comments** |
| --- | --- | --- | --- |
| Denmark | Secondary care | National Patient Register (Sundhedsdatastyrelsen) | Cost data collected based on DRG1 groups |
| Primary care | Estimated as an average share of primary care costs of other Nordic countries | Data not available |
| Medicines | Register of Medical Product Statistics (medstat.dk) | ATC codes2 L01, L02A, L02B, L03AX, L04AX |
| Finland | Secondary care | Finnish institute for health and welfare | Calculated using the number of visits / inpatient days and unit costs. Cancer as primary diagnosis. |
| Primary care |
| Medicines | Social Insurance Institution and Fimea | Finnish statistics on medicines (annual publication). Inpatient medicines based on wholesale prices, outpatient medicines based on actual reimbursements. Includes ATC codes L01, L02A, L02B and L04AX. |
| Iceland | Secondary care | Landspítala EMR3 | Calculated using the number of visits / inpatient days and average costs. Cancer as primary diagnosis. |
| Primary care | Estimated as an average share of primary care costs of other countries | Data not available. Costs were estimated based on [1] and [26]. |
| Medicines | Icelandic health Insurance | Total cost of medicines for ATC-codes L01, L02A, L02B and L04AX. |
| Norway | Secondary care | Norwegian Patient Registry | Costs are calculated based upon DRG weights. Includes patients with cancer as primary or secondary diagnosis. |
| Primary care | The Norwegian Health Economics Administration’s (Helfo) KUHR databas | Patients identified using the ICPC-2 classification system. Costs are calculated based on reimbursement fees and patient copayments. |
| Medicines | Wholesale statistics of Norwegian Institute of Public Health ([www.fhi.no/globalassets/](http://www.fhi.no/globalassets/) dokumenterfiler/rapporter/2018/ legemiddelforbruket-i-norge-2013-2017.pdf) | Total cost of medicines for ATC-codes L01, L02A, L02B |
| Sweden | Secondary care | Sveriges Kommuner och Regioner | Cost data collected based on DRG groups. Coverage calculated by comparing to the number of visits and inpatient episodes from Socialstyrelsen’s database |
| Primary care | Institute of Health Economics | Hofmarcher et al 2019, Kostnader för cancer i Sverige, https://ihe.se/wp-content/uploads/2016/05/IHE-Rapport-2016_1_.pdf |
| Medicines | Vårdanalys: cancer läkemedel 2017, Rapport 2017:8 | Total cost of medicines for ATC-codes L01, L02A, L02B and L04AX. |

1DRG = diagnosis related group

2ATC = anatomical therapeutic chemical

3EMR = electronic medical record
